# Supplementary material for: dcHiC detects differential compartments across multiple Hi-C datasets
Source: PubMed Central journal article supplement (PMC9652325; doi:10.1038/s41467-022-34626-6), 2022-11-11
Supplement: 41467_2022_34626_MOESM4_ESM.pdf [file 41467_2022_34626_MOESM4_ESM.pdf]

**Title: Supplementary Data 1:**

**Description:** This excel file contains functional enrichment analysis per cell type using genes overlapping A compartments with the highest compartmentalization score for that cell type compared to the other two for the comparison of ESC, NPC and CN cell types.

**Title: Supplementary Data 2:**

**Description:** This excel file contains the list of genes that were reported in dHiC differential compartment regions but were either within the A compartment throughout the ESC-NPC-CN transition or within the B compartment. The computed correlation of their compartment scores and gene expression are reported in each sheet.
